# Supplementary material for: Creation of a polymer backbone in lipid bilayer membrane-based nanotubes for morphological and microenvironmental stabilization
Source: Royal Society of Chemistry journal article supplement (doi:10.1039/c4ra03161j), 2014-01-01
Supplement: c4ra03161j1.pdf [file c4ra03161j1.pdf]

## ***Supplementary Information***

### **Creation of a polymer backbone in lipid bilayer membrane-based nanotubes**

Yutaka Okazaki,<sup>a</sup> Hirokuni Jintoku,<sup>a</sup> Makoto Takafuji,<sup>a</sup> Reiko Oda<sup>b</sup> and Hirotaka Ihara<sup>\*ac</sup>

<sup>a</sup>*Department of Applied Chemistry and Biochemistry, Kumamoto University, Kumamoto 860-8555, Japan*

<sup>b</sup>*Institute of Chemistry & Biology of Membranes & Nanoobjects, UMR5248 CBMN, CNRS - Université Bordeaux - Institut Polytechnique Bordeaux, 33607 Pessac, France*

<sup>c</sup>*Kumamoto Institute for Photo-Electro Organics (PHOENICS), Kumamoto, 862-0901, Japan*

<sup>\*</sup>ihara@kumamoto-u.ac.jp

#### **Instrumentations**

Photo-induced polymerization was carried out using Optical Modulex USH-250SC (Ushio Inc. (Japan)) of 0.75 kW power. <sup>1</sup>H NMR (400 MHz) spectra were recorded in CDCl<sub>3</sub> with SiMe<sub>4</sub> as an internal standard on JNM-EX400 (JEOL Ltd. (Japan)). FT-IR spectra were measured in a KBr method with FT/IR-4100 (JASCO Co. (Japan)). UV-Vis and CD spectra were measured with V-560 (JASCO Co.) and J725 (JASCO Co.), respectively. TEM images were observed with JEM-2000X (JEOL Ltd.). DSC thermograms were obtained with DSC 6100 (Seiko Instruments Inc. (Japan)). The aqueous solutions of **g<sub>12</sub>-Py<sup>+</sup>** with or without styrene (20 mM, 50 μL) were sealed in 70 μL silver pans and scanned between 0 and 70 °C at heating and cooling rate of 2 °C min<sup>-1</sup>.

#### **Synthesis of L-glutamide-derived amphiphile**

##### *Materials*

Styrene and divinylbenzene (DVB) were purchased from Wako Pure Chemical Industries, Ltd. (Japan) and purified by filtration through alumina. Irgacure 369 ( $\lambda_{\text{max}} = 321$  nm) was purchased from BASF (Japan). Reagent grade and measurement grade solvents were purchased from Nacalai Tesque, Inc. (Japan).

#### *Synthesis of $N^1$ -3-pyridinium propanoyl $N^2,N^3$ -didodecyl $L$ -glutamine ( $g_{12}\text{-Py}^+$ )*

$g_{12}\text{-Py}^+$  was prepared by the previously reported procedure.<sup>[1]</sup> mp 181.0-182.0 °C. (Found: C, 62.87; H, 9.69; N, 7.96.  $C_{37}H_{67}N_4O_3Br$  requires C, 63.86; H, 9.70; N, 8.05%).  $\nu_{\max}/\text{cm}^{-1}$  3332 and 3302 (N-H), 2918 and 2850 (C-H), 1638 (C=O), 1550 (N-H).  $\delta_H$  (400 MHz;  $CDCl_3$ ;  $Me_4Si$ ) 0.86-0.90 (6H, t,  $-CH_3$ ), 1.26 (36H, br s,  $-(CH_2)_9-$ ), 1.47 (4H, br,  $-COCH_2CH_2-$ ), 1.91-2.11 (2H, m,  $-C^*HCH_2-$ ), 2.20-2.35 (2H, m,  $-C^*HCH_2CH_2-$ ), 3.10-3.20 (4H, dt,  $-COCH_2-$ ), 3.25-3.50 (2H, m,  $-\text{PyCH}_2-$ ), 4.20-4.30 (1H, dt,  $C^*H$ ), 5.18 (2H, t,  $-\text{PyCH}_2CH_2-$ ), 6.84 (1H, t,  $-NH-$ ), 6.94 (1H, t,  $-NH-$ ), 8.00-8.10 (2H, t,  $m\text{-PyH}$ ), 8.34-8.38 (1H, d,  $-NH-$ ), 8.43 (1H, t,  $p\text{-PyH}$ ), 9.40-9.43 (2H, d,  $o\text{-PyH}$ ). MALDI TOF MS: Calcd for  $C_{37}H_{67}N_4O_3^+$  615.97,  $m/z$  = 615.92.

#### **Intercalation of a polymer backbone into the bilayers**

##### *Preparation of lipid bilayer membrane based-nanotubes*

$g_{12}\text{-Py}^+$  (10 mg) was dissolved in 2.5 mL of water, and the mixture was sonicated at 60 °C to be clear. 0.1 mL of methanol solution of a mixture of styrene, DVB (65 : 35 w/w) and Irgacure 369 (5 wt% for monomers) was added to the solution, and the mixture was sonicated in an ice bath for 5 minutes. The obtained solution was diluted with water to 0.5 mM  $g_{12}\text{-Py}^+$  and kept at 10 °C for an hour. As a reference, 0.1 mL of methanol was used in place of the monomer solution.

##### *Photo-initiated radical polymerization*

The solution of a mixture of  $g_{12}\text{-Py}^+$  and monomers was put into a 1 mm quartz cell, and UV light was irradiated to the solution through a UV cut filter for 2 hours at 10 °C with the ultrahigh-pressure mercury lamp.

##### *Removal of $g_{12}\text{-Py}^+$ from a polymer backbone*

After photo-irradiation, an excess amount of ethanol was added to the aqueous solution. The obtained precipitates were collected by centrifugation, and the extracted  $g_{12}\text{-Py}^+$  in the supernatant was detected with FT-IR spectroscopy and reversed-phase HPLC. This washing process was repeated until no  $g_{12}\text{-Py}^+$  was detected in the supernatant.

##### *Sample preparation for TEM observation*

A drop (ca. 20  $\mu\text{L}$ ) of the  $g_{12}\text{-Py}^+$  aqueous solution was mixed with another drop (ca. 20  $\mu\text{L}$ ) of an uranyl acetate aqueous solution (1 wt%) on a paraffin film for negative staining. A carbon-coated copper grid was placed on the mixed solution and allowed to stand for 5 min. Excess solution on the

grid was removed by a paper filter. After vacuum drying, the grid was used for TEM observation.

---

[1] H. Ihara, M. Takafuji, C. Hirayama and D. F. O'Brien, *Langmuir*, 1992, **8**, 1548; V. Gopal, T. K. Prasad, N. M. Rao, M. Takafuji, M. M. Rahman and H. Ihara, *Bioconjug. Chem.*, 2006, **17**, 1530-1536.

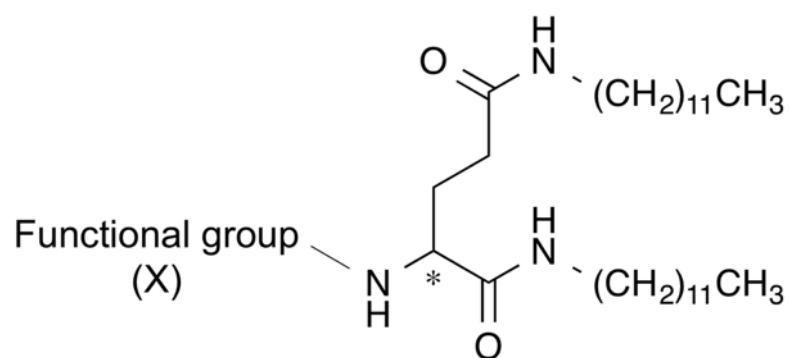

**Fig. S1** Base structure of L-glutamic acid-derived compound for creating nanofibrillar aggregates.

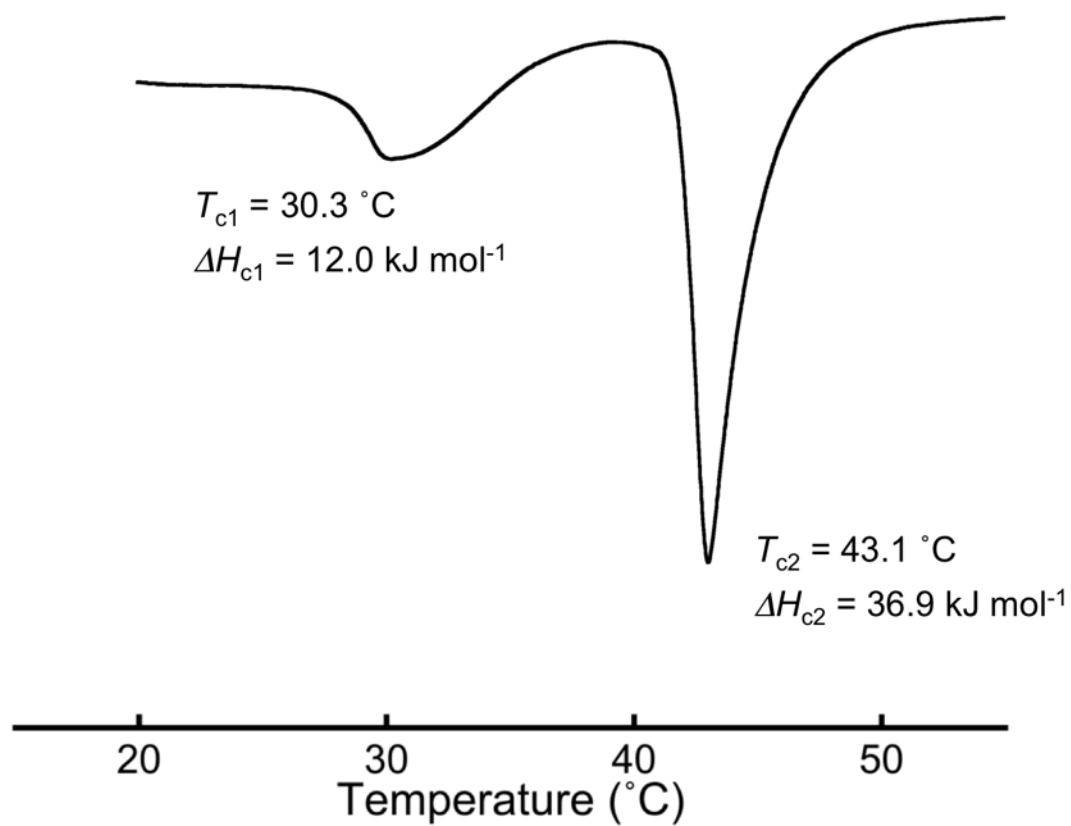

**Fig. S2** DSC thermogram of aqueous solution of  $g_{12}\text{-Py}^+$ .  $[g_{12}\text{-Py}^+] = 20\text{ mM}$ .

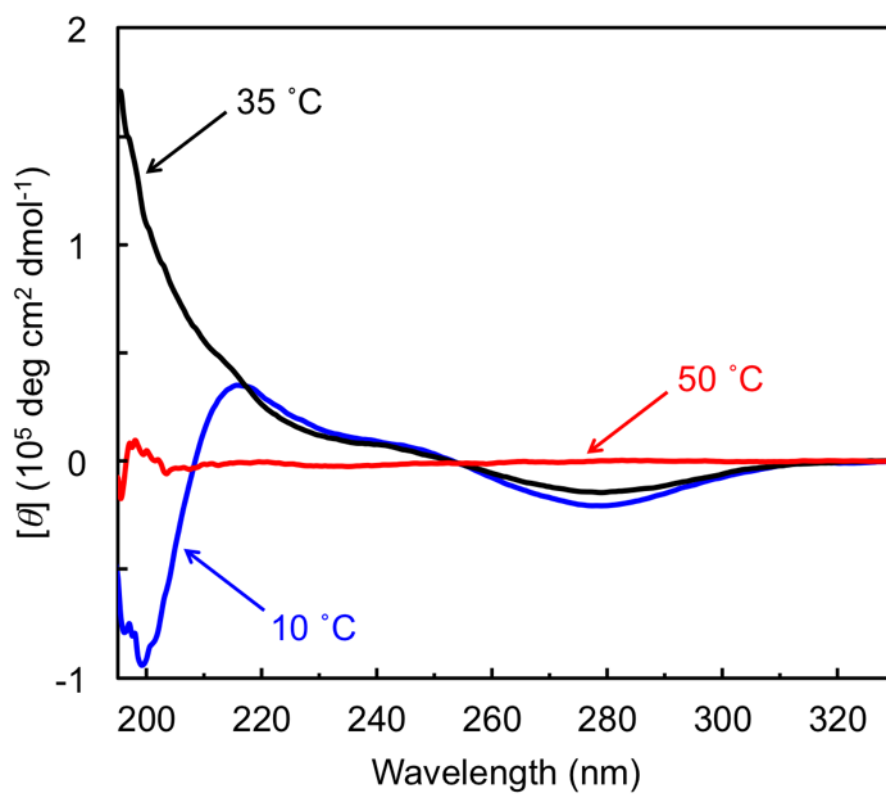

**Fig. S3** CD spectra of 0.5 mM of  $g_{12}$ -Py<sup>+</sup> in water at 10 °C (blue line), 35 °C (black line) and 50 °C (red line).

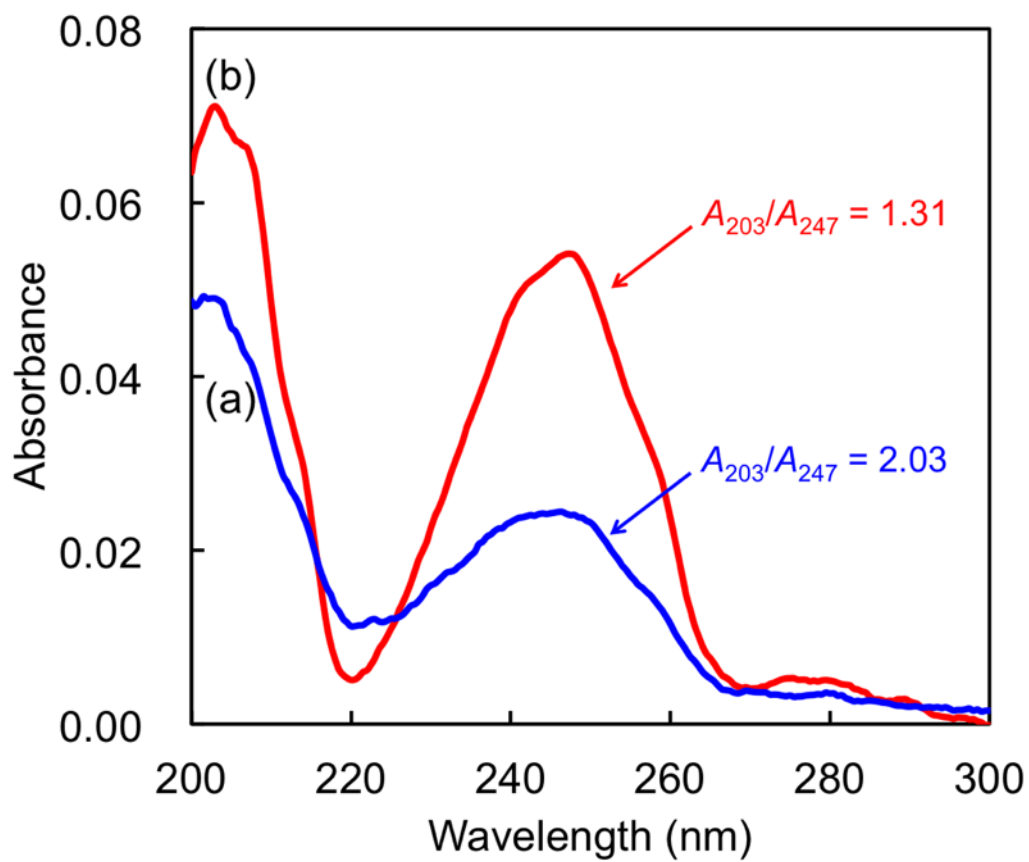

**Fig. S4** (a) UV spectrum of styrene (0.02 mM) in water; (b) UV spectrum of styrene (0.67 mM) in  $g_{12}\text{-Py}^+$  aqueous solution.  $[g_{12}\text{-Py}^+] = 0.5$  mM, styrene/ $g_{12}\text{-Py}^+ = 1$  (w/w).

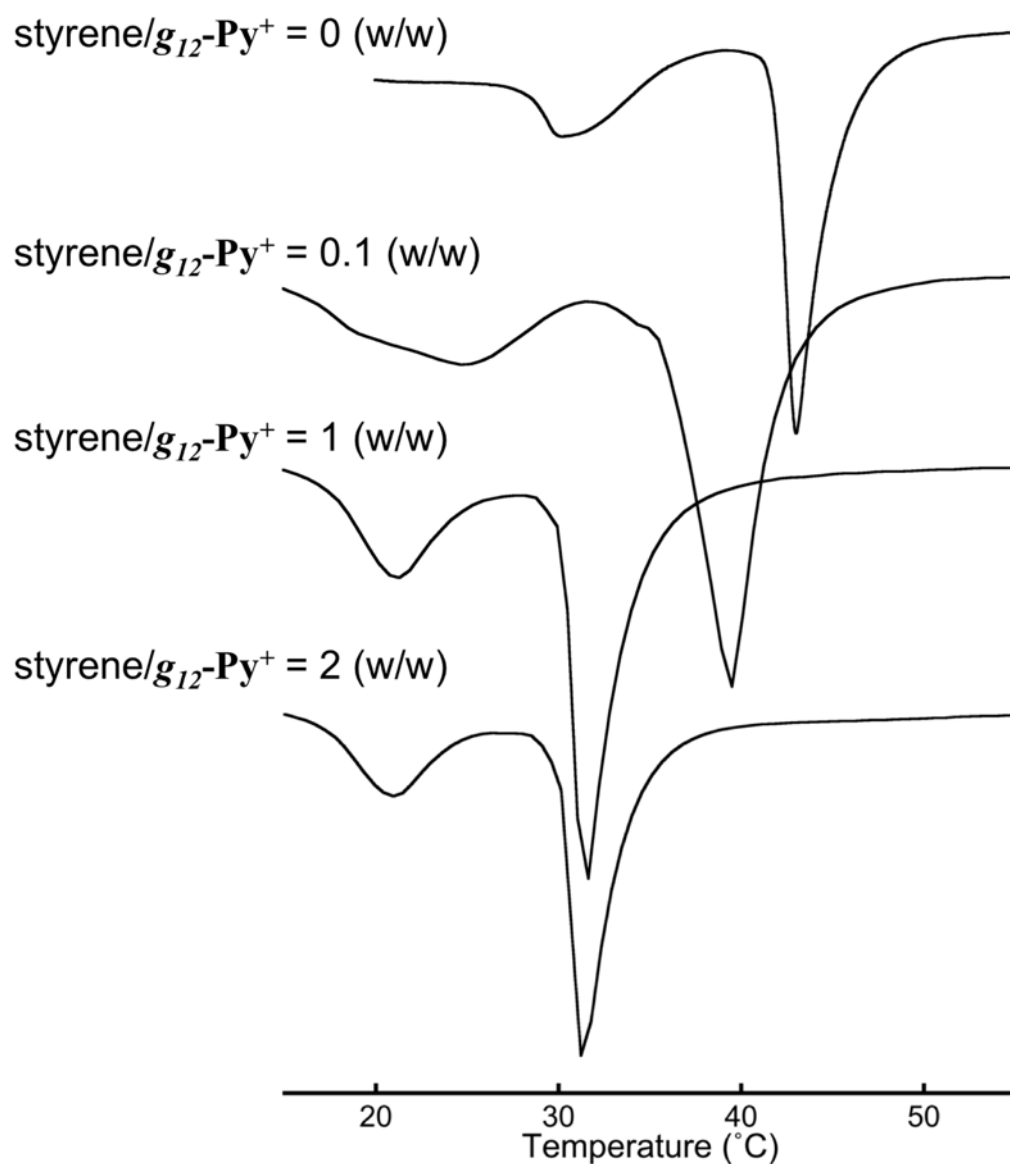

**Figure S5** DSC thermograms of aqueous solutions of  $g_{12}$ -Py<sup>+</sup> with styrene. [ $g_{12}$ -Py<sup>+</sup>] = 20 mM, styrene/ $g_{12}$ -Py<sup>+</sup> = 0, 0.1, 1, and 2 (w/w).

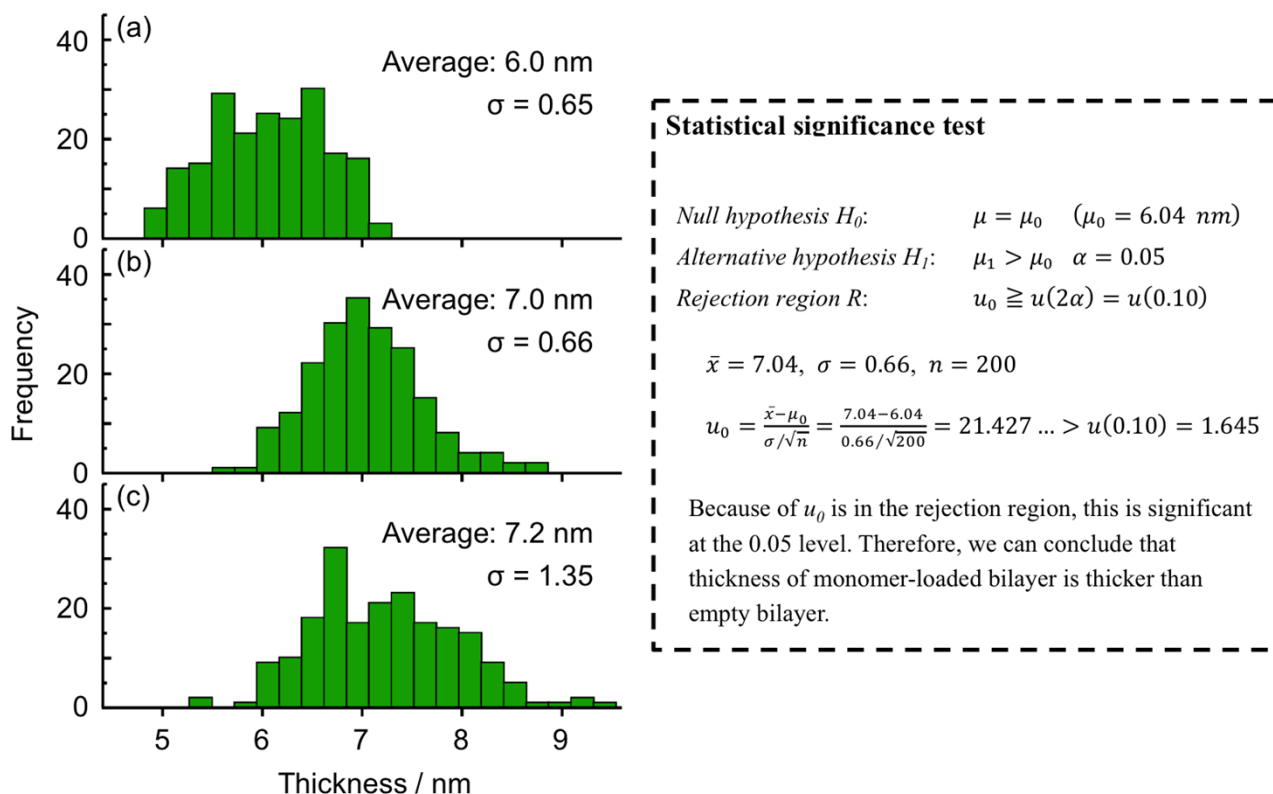

**Fig. S6** Thickness distribution of  $g_{12}\text{-Py}^+$  aggregates: (a) without monomer, (b) with styrene (100 wt% for  $g_{12}\text{-Py}^+$ ) and (c) with polymerized styrene-DVB (65 wt% and 35 wt% for  $g_{12}\text{-Py}^+$ ).  $[g_{12}\text{-Py}^+] = 0.5$  mM, monomer/ $g_{12}\text{-Py}^+ = 1$  (w/w).

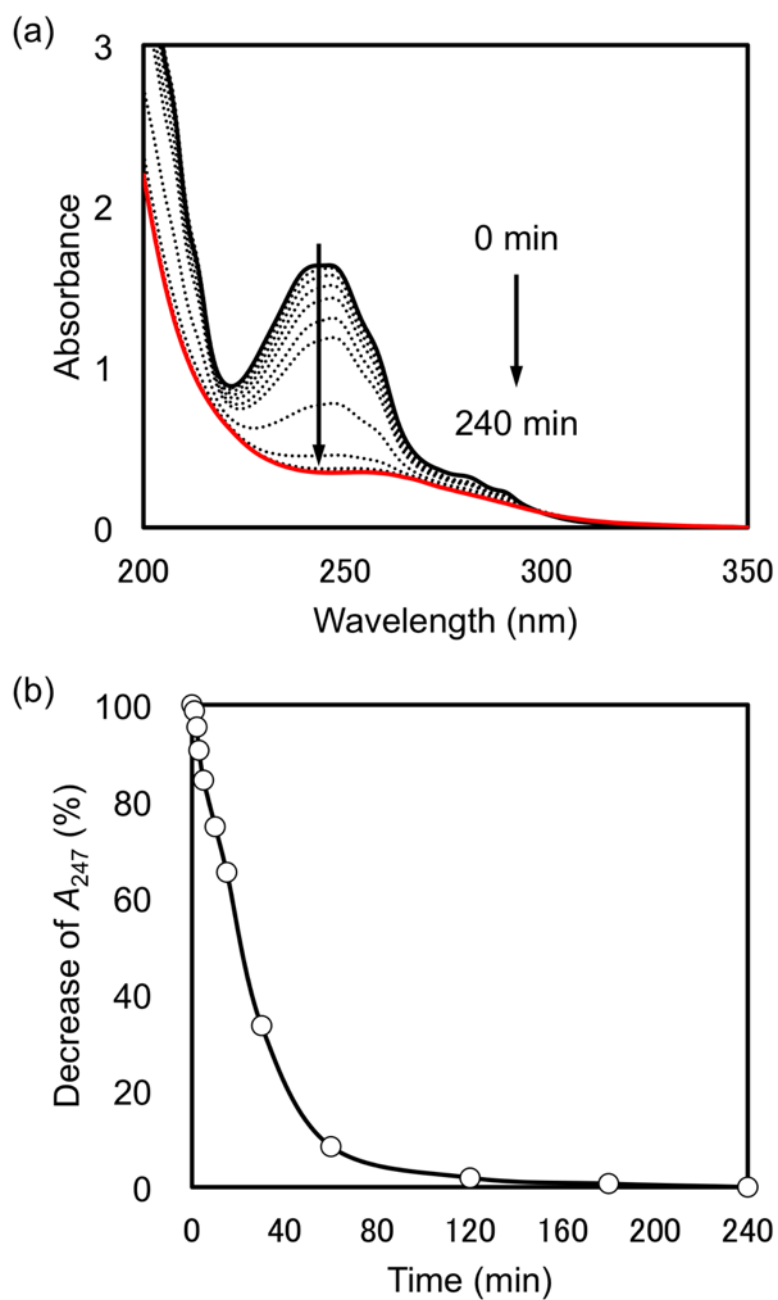

**Figure S7** a) UV-vis spectral changes of a styrene-DVB (65:35 w/w) mixture in the presence of  $g_{12}\text{-Py}^+$  nanotubes under photoirradiation at 10 °C. b) Decreasing rate of absorbance at 247 nm ( $A_{247}$ ) during photoirradiation.  $[g_{12}\text{-Py}^+] = 0.5 \text{ mM}$ , monomer/ $g_{12}\text{-Py}^+ = 1 \text{ (w/w)}$ .

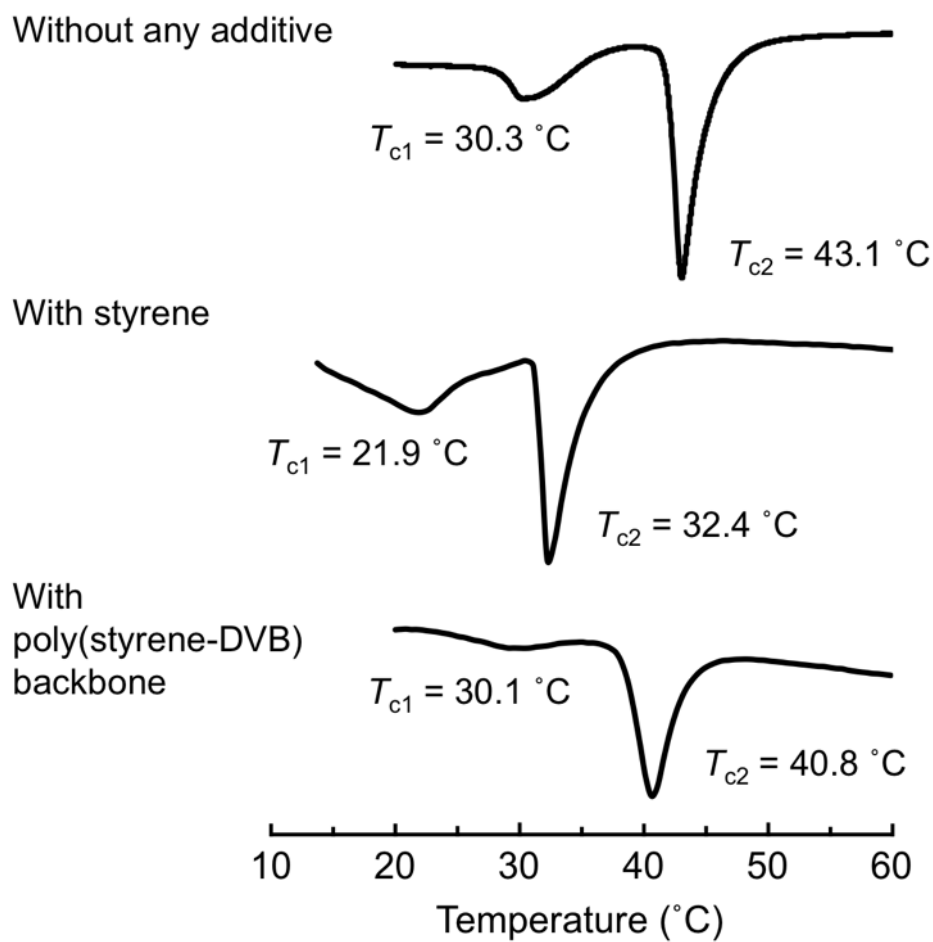

**Figure S8** DSC thermograms of aqueous solutions of  $g_{12}\text{-Py}^+$  (a) without any additive, (b) with styrene and (c) with poly(styrene-DVB) backbone .  $[g_{12}\text{-Py}^+] = 20\text{ mM}$ , monomer/ $g_{12}\text{-Py}^+ = 1$  (w/w).
